# Supplementary material
Source: Springer Nature journal article supplement (https://www.springermedizin.de/resource/supplementary/12875_2011_585_MOESM3_ESM.pdf/9434978)

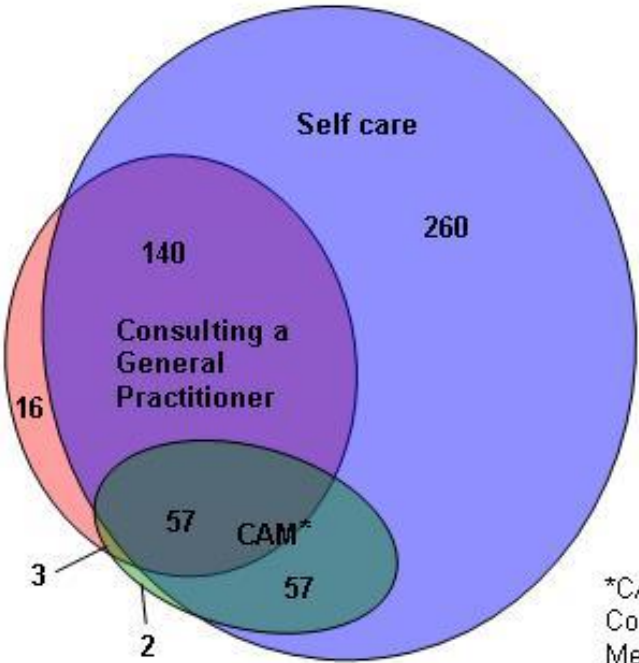

\*CAM = Consulting a Complementary and Alternative Medicine practitioner

Supplement: MOESM3 [file 9434978]
